# Supplementary material for: Multi-walled carbon nanotubes complement the anti-tumoral effect of 5-Fluorouracil
Source: PubMed Central journal article supplement (PMC6459348; doi:10.18632/oncotarget.26770), 2019-03-12
Supplement: oncotarget-10-2022-s001.pdf [file oncotarget-10-2022-s001.pdf]

# Multi-walled carbon nanotubes complement the anti-tumoral effect of 5-Fluorouracil

## SUPPLEMENTARY MATERIALS

### APPENDIX A

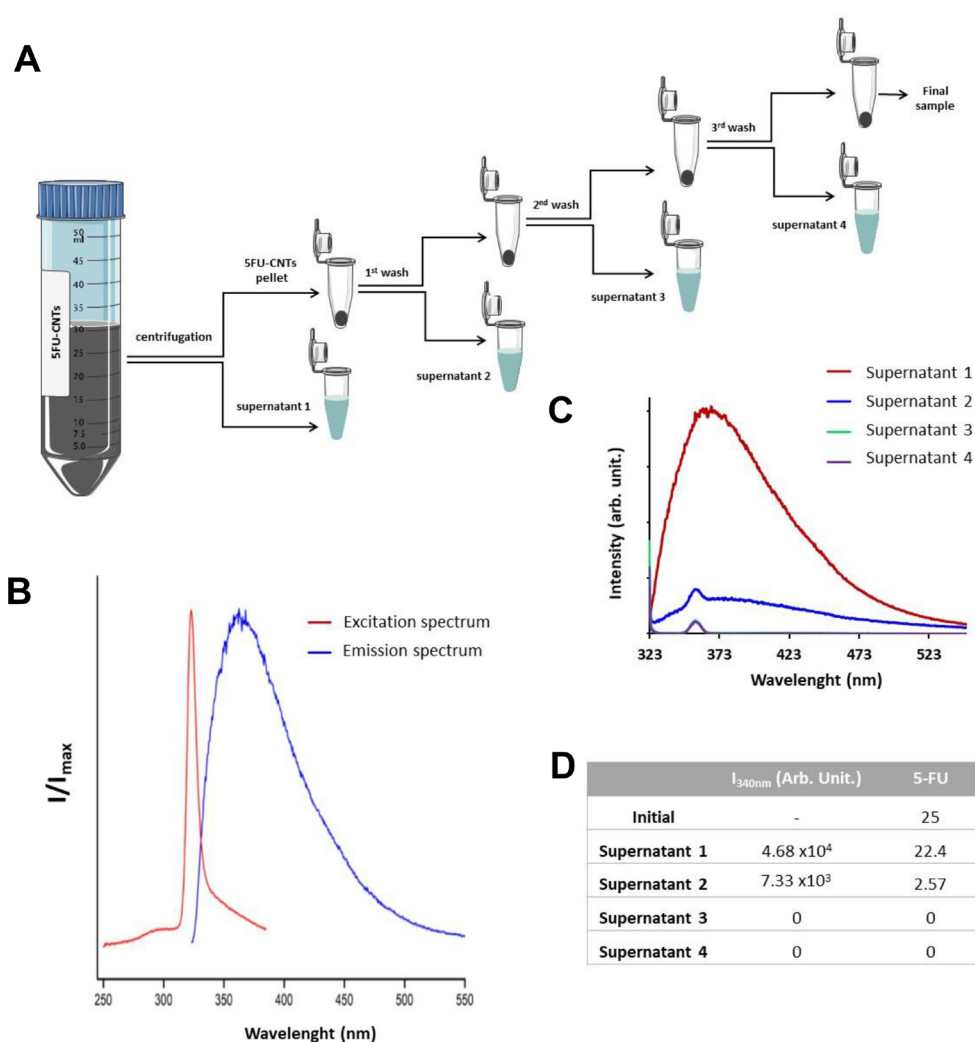

**Supplementary Figure 1: 5FU-MWCNTs sample characterization.** (A) Representative scheme of the process carried out to wash 5-FU-MWCNTs sample. (B) Excitation spectra (red) and emission (blue) of 5-FU. The spectra are normalized to the maximum intensity. The excitation spectrum was carried out by monitoring intensity at  $\lambda = 455$  nm. The emission spectrum was obtained by exciting at  $\lambda = 317$  nm, giving a maximum emission at  $\lambda = 363$  nm. (C) Fluorescence emission spectra of supernatant (red line) and the sequential washes (blue, green and purple lines). As we start with a known concentration of 5-FU, we have subtracted the correspond concentrations from the supernatant and washes, thus, we obtain a 3% of the mass of the sample corresponds to 5-FU. (D) Calculated concentration of residual 5-FU in the supernatants after repeated washing. The intensities were taken at 340 nm wavelength.

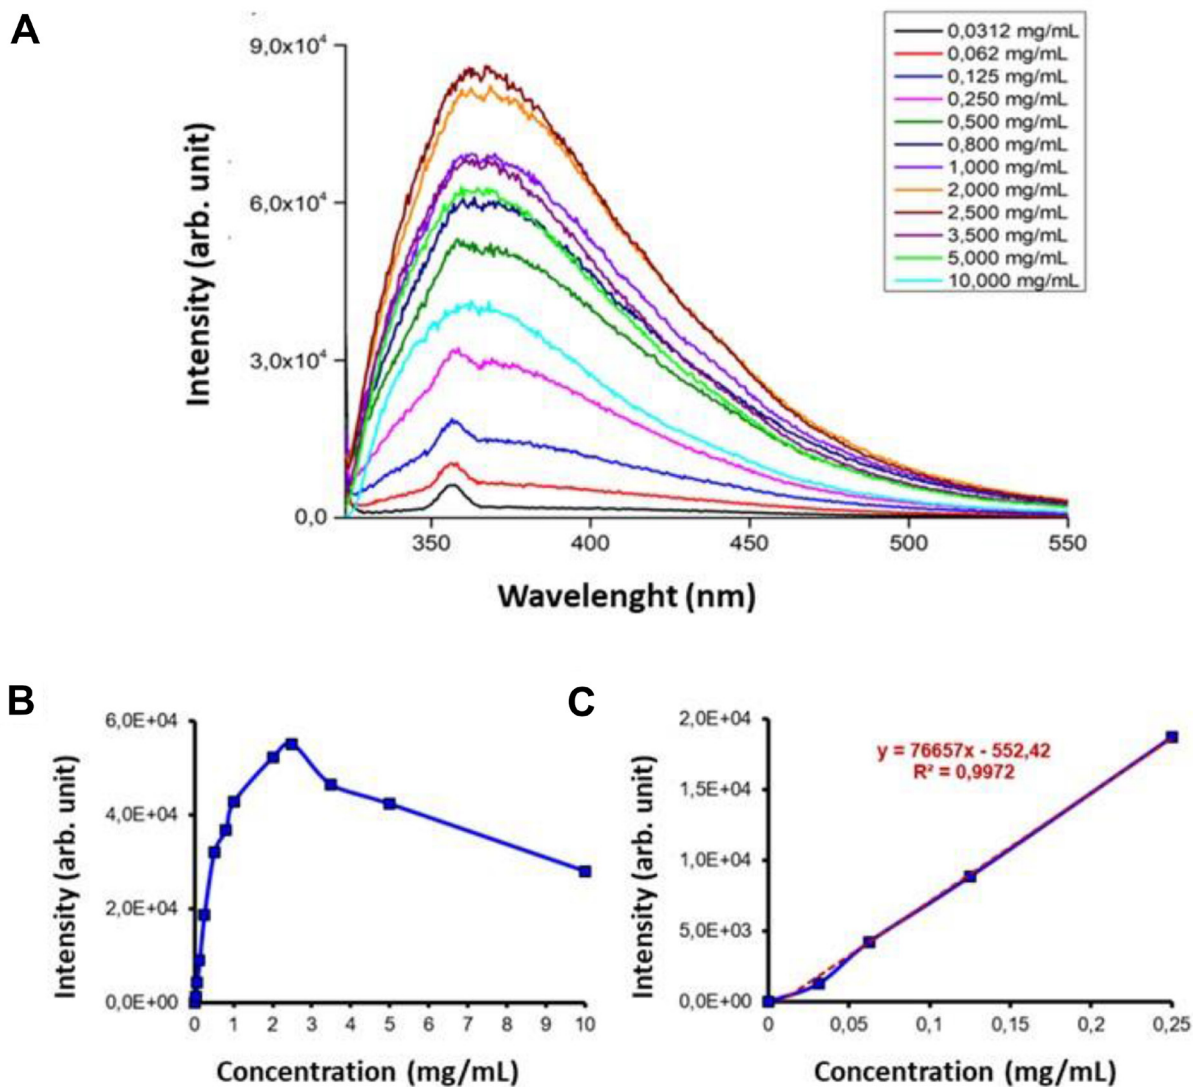

**Supplementary Figure 2: Calibration curve of 5-FU using fluorescence spectroscopy.** (A) 5-FU emission spectra for a range of concentrations between 0.0312 and 10 mg/mL. At low concentrations (between 0.25 and 0.0312 mg/mL) a band begins to appear (maximum intensity at 356 nm) that corresponds to the signal of water. (B) Calibration curve of 5-FU for fluorescence intensities corresponding to  $\lambda = 340$  nm. From 2.5 mg/mL the emission intensity begins to decrease, so for the same emission intensity there will be two possible concentrations. (C) At low concentrations the relationship between emission intensity and concentration is linear with  $R^2 = 0.9972$ .

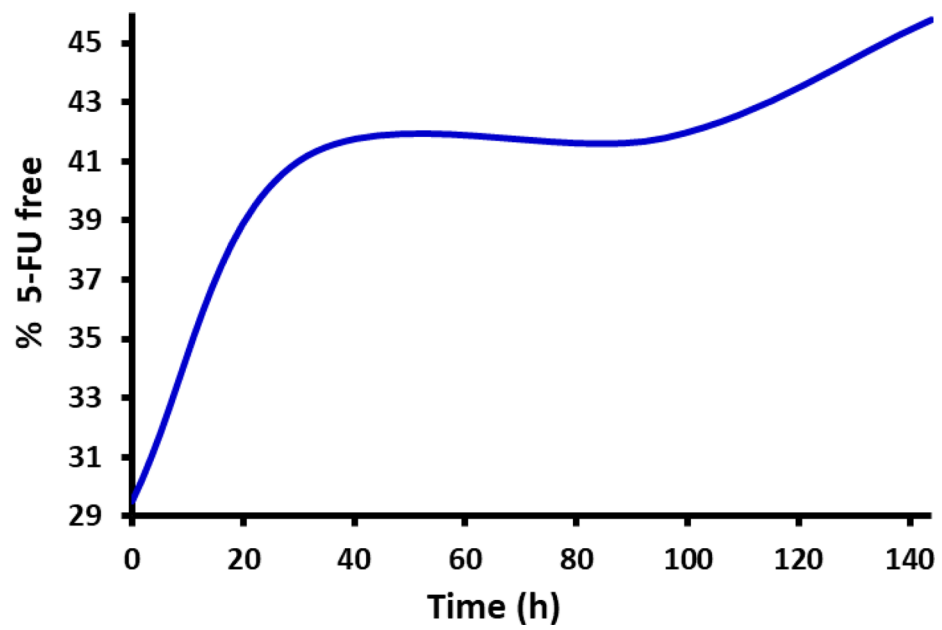

**Supplementary Figure 3: In vitro 5-FU release assay.** 5-FU release of 5-FU-MWCNTs upon exposure to physiological conditions (PBS 1× at 37° C).

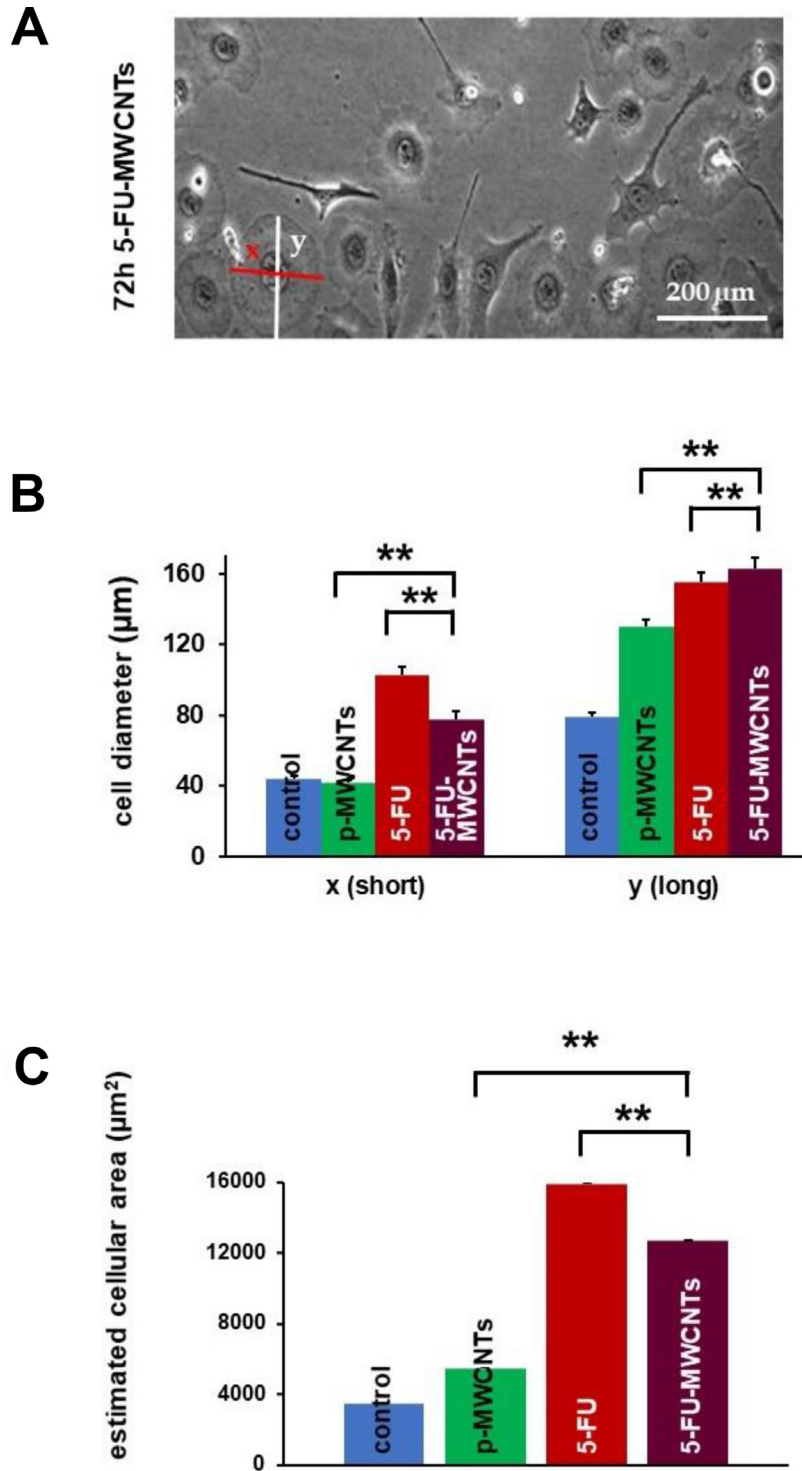

**Supplementary Figure 4: Statistical analysis of the changes in cell size.** (A) Representative phase contrast image of the cells treated with 5-FU-MWCNTs, where representative measurements along the X (red) and Y (white) axes are indicated. (B) Histograms representing the estimated cellular lengths along the X and Y axes upon cell exposure to the different treatments ( $n = 150$ ,  $** = t_{.9995}$ ). (C) Histogram of the estimated cellular area resulting of the multiplication of X and Y axes ( $n = 150$ ,  $** = t_{.9995}$ ). the estimated areas of the HeLa cells upon exposure to the different treatments ( $n = 150$ ,  $** = t_{.9995}$ ).
